# Supplementary material
Source: publisher site journal article supplement (https://www.dovepress.com/article/491944)
Supplement: Supplementary file 1 [file get_supplementary_file.php]

**Supplementary tables**

**Supplementary Table 1**. Comparison of sociodemographic and pharmacological variables between the population and the sample of patients with insulin dispensations, Colombia

| **Variables** | **Population** | | **Sample** | |
| --- | --- | --- | --- | --- |
| **n=69356** | **%** | **n=382** | **%** |
| Women | 64.0 (56.0-73.0) | | 66.0 (58.0-74.0) | |
| Age, median (Interquartile range) | 34643 | 49.9 | 212 | 55.5 |
| Mujeres | 38641 | 55.7 | 215 | 56.3 |
| Origin | - | - | - | - |
| Caribbean Region | 20844 | 30.1 | 40 | 10.5 |
| Bogotá-Cundinamarca Region | 18221 | 26.3 | 89 | 23.3 |
| Pacific Region | 14802 | 21.3 | 123 | 32.2 |
| Central Region | 12527 | 18.1 | 111 | 29.1 |
| Eastern-Orinoquia-Amazonia Region | 2962 | 4.3 | 19 | 5.0 |
| Treatment schemes | - | - | - | - |
| Long-acting insulin | 40370 | 58.2 | 249 | 65.2 |
| Long-acting + short-acting insulin | 27467 | 39.6 | 123 | 32.2 |
| Short-acting insulin | 1519 | 2.2 | 10 | 2.6 |
| Other antidiabetics | 57189 | 82.5 | 313 | 81.9 |
| Metformin | 43872 | 63.3 | 244 | 63.9 |
| Dipeptidyl peptidase 4 inhibitors | 33829 | 48.8 | 173 | 45.3 |
| Sodium-glucose Cotransporter-2 inhibitors | 25460 | 36.7 | 127 | 33.2 |
| Glucagon-like peptide analogues | 11244 | 16.2 | 21 | 5.5 |
| Sulfonylureas | 754 | 1.1 | 3 | 0.8 |
| Comedicaciones | - | - | - | - |
| Lipid-lowering | 48004 | 69.2 | 243 | 63.6 |
| Antihypertensives and diuretics | 47813 | 68.9 | 264 | 69.1 |
| Antiplatelet agents | 25904 | 37.3 | 164 | 42.9 |
| Antiulcer | 21608 | 31.2 | 133 | 34.8 |
| Analgesics and anti-inflammatories | 20180 | 29.1 | 138 | 36.1 |

**Supplementary Table 2**. Binary logistic regression on the variables related to having high satisfaction with insulin application devices.

| **Variables** | **Sig.** | **OR** | **95%CI** | |
| --- | --- | --- | --- | --- |
| **Lower** | **Upper** |
| Woman (yes/no) | 0.258 | 0.784 | 0.514 | 1.196 |
| Age (continuous) | 0.982 | 1.000 | 0.983 | 1.017 |
| Origin Bogota-Cundinamarca (yes/no) | 0.591 | 0.869 | 0.521 | 1.449 |
| Low socioeconomic level (yes/no) | 0.668 | 0.909 | 0.587 | 1.407 |
| Contributory regime (yes/no) | 0.161 | 1.534 | 0.843 | 2.793 |
| Chronic kidney disease (yes/no) | 0.905 | 1.039 | 0.555 | 1.947 |
| Prescribing physician: Internist or endocrinologist (yes/no) | 0.236 | 1.507 | 0.765 | 2.971 |
| Insulin analogues (yes/no) | 0.770 | 0.927 | 0.558 | 1.541 |
| Long-acting insulin (yes/no) | 0.813 | 0.946 | 0.598 | 1.497 |
| Other concomitant antidiabetics (yes/no) | 0.723 | 0.902 | 0.508 | 1.599 |
| Antihypertensives and diuretics (yes/no) | 0.956 | 1.014 | 0.616 | 1.671 |
| Hypolipidemics (yes/no) | 0.588 | 1.134 | 0.719 | 1.791 |

Sig: Statistical significance; OR: Odds Ratio; CI: Confidence Interval. Goodness of fit according to the Hosmer-Lemeshow test: 0.980.
